# Supplementary material for: 2D/3D heterostructured CsPbI2Br solar cells: a choice for a monolithic all-perovskite tandem device
Source: Royal Society of Chemistry journal article supplement (doi:10.1039/d2ta03627d), 2022-01-01
Supplement: d2ta03627d1.pdf [file d2ta03627d1.pdf]

## *Supporting Information*

### **2D/3D Heterostructured CsPbI<sub>2</sub>Br Solar Cells: A Choice for a Monolithic All-perovskite Tandem Device**

Liqiu Yan<sup>a</sup>, Yan Li<sup>a</sup>, Siqi Li<sup>a</sup>, Xiangnan Sun<sup>a</sup>, Yao Li<sup>a</sup>, Xue Han<sup>b</sup>, Meilan Huang<sup>c</sup>,  
Xia Tao<sup>a,\*</sup>

a State Key Laboratory of Organic-Inorganic Composites, Beijing University of  
Chemical Technology, Beijing 100029, China

b Department of Chemical Engineering, Virginia Polytechnic Institute and State  
University, Blacksburg, Virginia 24061, United States

c School of Chemistry & Chemical Engineering, Queen's University Belfast, Belfast,  
BT9 5AG, UK

\* Corresponding author. Tel: +86-10-6445-3680 Fax: +86-10-6443-4784

E-mail: taoxia@mail.buct.edu.cn

## Experimental section

**Materials:** Cesium iodide (CsI, 99.999%), lead bromide (PbBr<sub>2</sub>, 99.999%), lead iodide (PbI<sub>2</sub>, 99.999%), n-butylammonium bromide (BABr, 99.5%), methylazanium iodide (MAI, 99.9%), PEDOT:PSS (PH1000, 1.0~1.3 wt%), Fullerene (C<sub>60</sub>, 99%), Spiro-OMeTAD and Tris (2- (1H-pyrazol-1-yl)-4-tert-butylpyridine)-cobalt (III)Tris (bis- (trifluoromethyl sulfonyl) imide)) (FK209) were purchased from Xi'an Polymer Light Technology Corp. SnO<sub>2</sub> colloid precursor (15 wt% in H<sub>2</sub>O colloidal dispersion) was purchased from Alfa Aesar. Dimethyl sulfoxide (DMSO, 99.8%), isopropanol (IPA, 99.5%), chlorobenzene (CB, 99.9%), acetonitrile (ACN, 99.8%), Li-TFSI (99.95%), and TBP (4-tert-butylpyridine, 96%) were purchased from Sigma-Aldrich. All materials were used without further purification.

### Perovskite Film Characterization:

**XRD:** The crystal structure of perovskite layers with different treatment concentrations were examined by X-ray diffractometer (XRD) (Bruker Metrology Nanoscope III-D) with Cu K $\alpha$  radiation ( $\lambda = 1.5418 \text{ \AA}$ ) operated at 30 mA and 40 kV. The XRD data were taken from unfinished devices on the same layer sequence as the perovskite solar cell, but excluding the Ag electrode and the Spiro-OMeTAD HTL.

**SEM:** High-resolution field emission cross-sectional and top-view scanning electron microscope (SEM) images of CsPbI<sub>2</sub>Br perovskite films with the different treatment concentrations of 0, 0.1, 0.5, 1, and 3 mg mL<sup>-1</sup> BABr solution were taken with a scanning electron microscope (S4700) with an in-lens detector and an aperture size of 20  $\mu\text{m}$ .

AFM: Atomic Force Microscope (AFM) is used to test the surface roughness of samples, the model used is the German Bruker-Fastscan. The principle is to show the three-dimensional morphology according to the different forces on the surface area of the sample, and finally calculate its mean square value. The film sample prepared in the experiment has a scanning area of  $4 \mu\text{m}^2$  and a resolution of  $256 \times 256$  Hz.

UV-vis: Ultraviolet-visible (UV-vis) absorption spectra were recorded using a UV-vis-NIR spectrophotometer (Lambda 950, PerkinElmer, USA) in the 300-800 nm wavelength range at room temperature. In addition, the device can also test the transmittance of the electron transport layer to ultraviolet and visible light.

PL and TRPL: The steady-state photoluminescence (PL) spectrum (FLS920, Edinburgh Instruments, U.K.) was first used in the experiment, the excitation wavelength was set to 460 nm, and the scanning wavelength was 600-750 nm. Secondly, transient photoluminescence (TRPL) spectroscopy is used, it was measured on a photoluminescent spectrometer (FLS 980, Edinburgh Instruments), excited with a picosecond pulsed diode laser CW NIR laser at 470 nm as the excitation source.

XPS and UPS: The X-ray photoelectron spectroscopy (XPS) (Thermo Scientific K-Alpha+) measurement is used to test the change of spectral peak, XPS were determined suitable to avoid an influence of beam-induced changes on the spectra. Ultraviolet photoelectron spectroscopy (UPS) measurement (Thermo ESCALAB XI+) is used to test the change of work function and energy level.

Raman: Raman spectra were measured using a microspectroscopic Raman setup to analyze the molecular structure and composition changes (Raman-HR-TEC-405).

**Device Characterization:**

*J-V*: Photovoltaic performance of PSCs was characterized by measuring the current density-voltage (*J-V*) curve under AM 1.5G sunlight with  $100 \text{ mW cm}^{-2}$  light output using a solar light simulator (Newport Oriel Sol 3A class, US, calibrated by a Newport reference cell), and the data were recorded with a Keithley 2400 source meter from 1.5 V to -0.5 V with a scan rate of  $0.2 \text{ V s}^{-1}$  and a pre-condition of 0.5 s. The cell size was  $1.5 \times 1.5 \text{ cm}$ , and the active area of each solar cell was  $0.04 \text{ cm}^2$ , which was defined by the area of the Ag electrode.

EQE: Also known as IPCE, EQE was acquired by an Oriel QEPVSI system equipped with a 300 W Xe lamp for irradiation together with a calibrated silicon photodetector.

M-S: The Mott-Schottky test is an important method to explain the charge recombination mechanism. It was performed on the Zennium electrochemical workstation at 10 kHz frequency under dark condition.

EIS: Electrochemical impedance spectra (EIS) was recorded using a Zahner system of the Zennium electrochemical workstation under dark conditions and illuminated under AM 1.5G sunlight with a bias of 0.8 V, with frequencies ranging from 10 Hz to 1 M Hz and a modulation amplitude of 10 mV.

SCLC: Space-charge-limited Current (SCLC) test was measured at room temperature under dark conditions to characterize the defect state density of perovskite thin films in pure electronic devices.

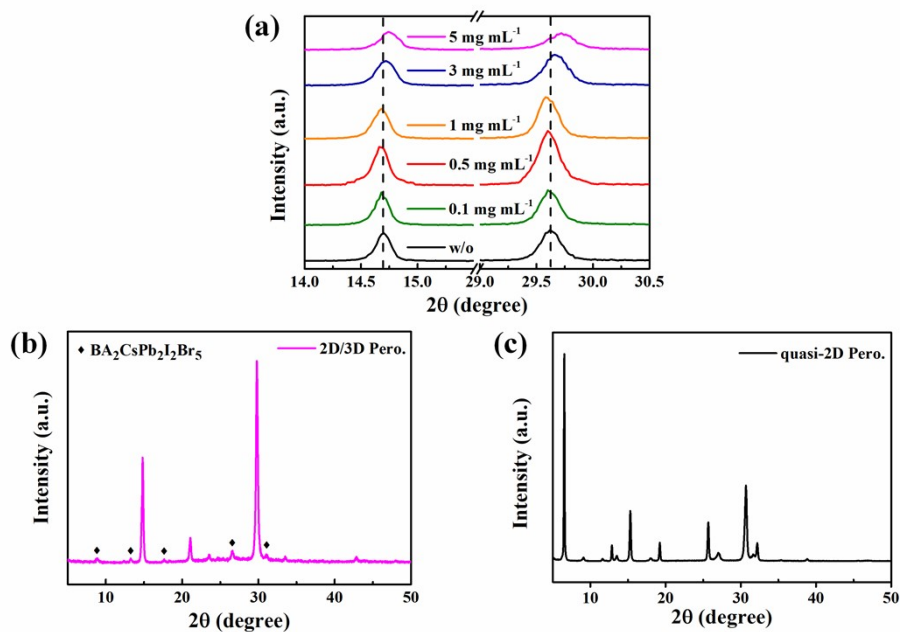

Fig. S1 (a) Magnification of XRD patterns at (100) and (200) planes, XRD patterns of (b)  $5 \text{ mg mL}^{-1}$  BACl<sub>2</sub> treated CsPbI<sub>2</sub>Br and (c) BA<sub>2</sub>CsPb<sub>2</sub>I<sub>2</sub>Br<sub>5</sub> films.

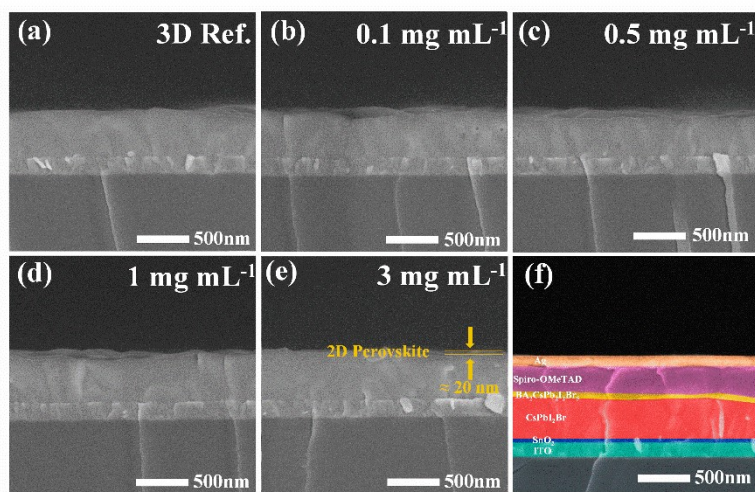

Fig. S2 Cross-sectional SEM images of the CsPbI<sub>2</sub>Br samples modified with different concentrations of BACl<sub>2</sub>: (a)  $0 \text{ mg mL}^{-1}$ , (b)  $0.1 \text{ mg mL}^{-1}$ , (c&f)  $0.5 \text{ mg mL}^{-1}$  and (d)  $1 \text{ mg mL}^{-1}$  and (e)  $3 \text{ mg mL}^{-1}$ .

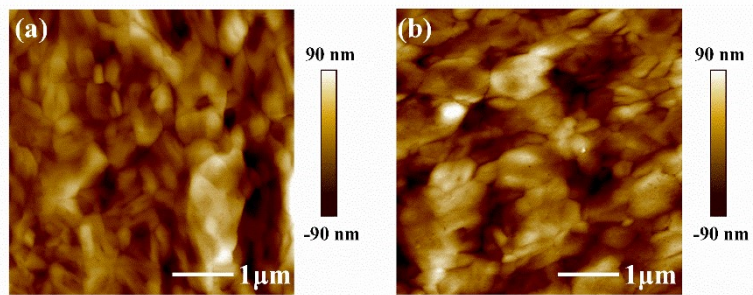

Fig. S3 Top-view AFM images of the (a) pristine and (b) 2D/3D perovskite films with  $0.5 \text{ mg mL}^{-1}$  BABr.

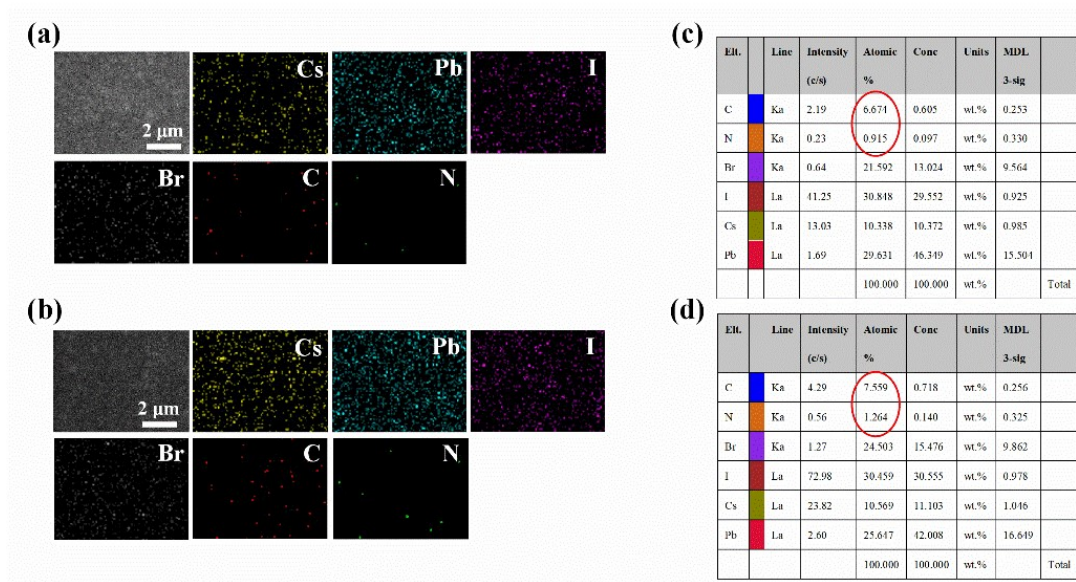

Fig. S4 SEM and EDS mappings of (a) pristine and (b) 2D/3D perovskite films with  $0.5 \text{ mg mL}^{-1}$  BABr and (c&d) the percentage of element content in the control group and the optimized group.

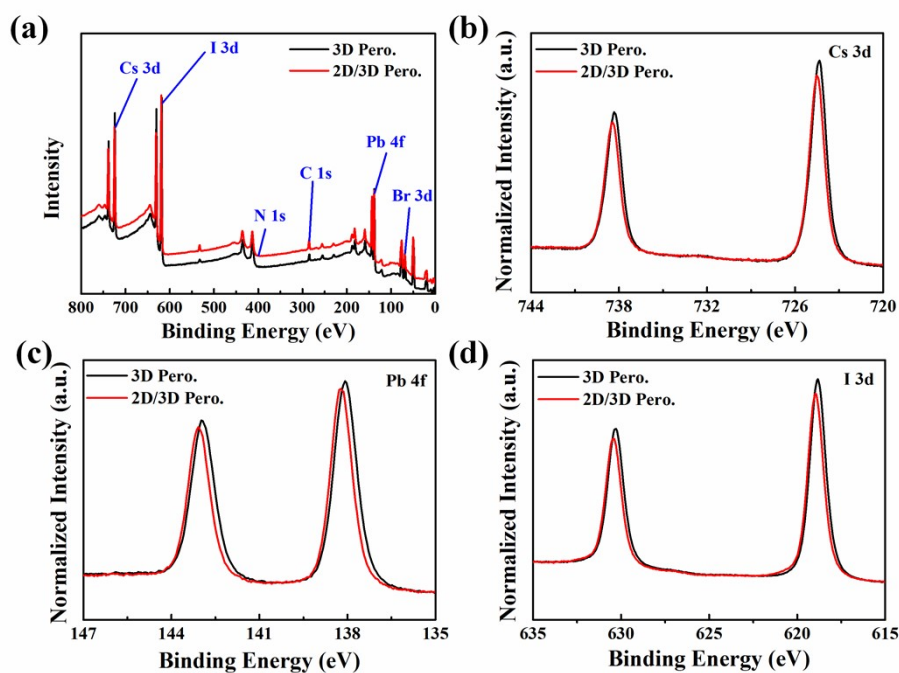

Fig. S5 XPS of (a)  $\text{CsPbI}_2\text{Br}$ , (b) Cs 3d, (c) Pb 4f and (d) I 3d of the 3D  $\text{CsPbI}_2\text{Br}$  (black) and the 2D/3D perovskite films (red) treated with  $0.5 \text{ mg mL}^{-1}$  BABr.

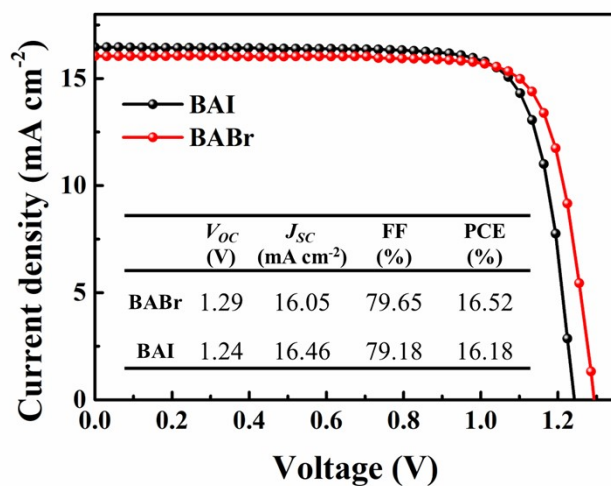

Fig. S6  $J$ - $V$  curves of optimized devices with BABr and BAI treated  $\text{CsPbI}_2\text{Br}$ .

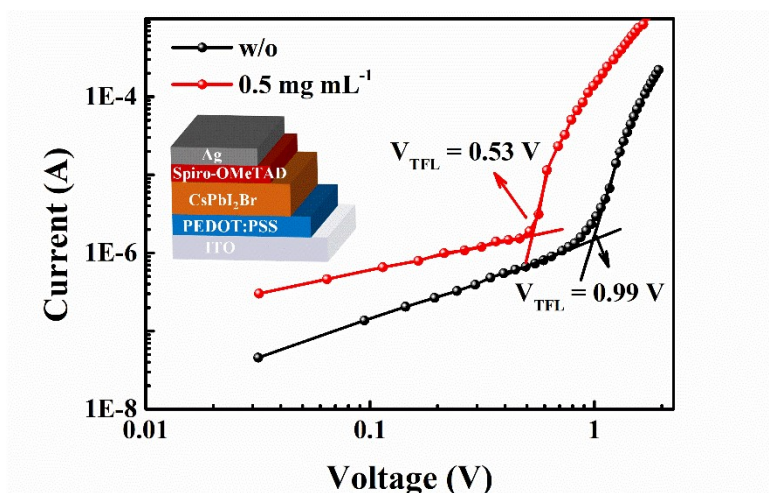

Fig. S7 Dark J-V curves for the hole-only devices with the structure of glass/ITO/PEDOT:PSS/2D/3D CsPbI<sub>2</sub>Br (or 3D CsPbI<sub>2</sub>Br)/Spiro-OMeTAD/Ag.

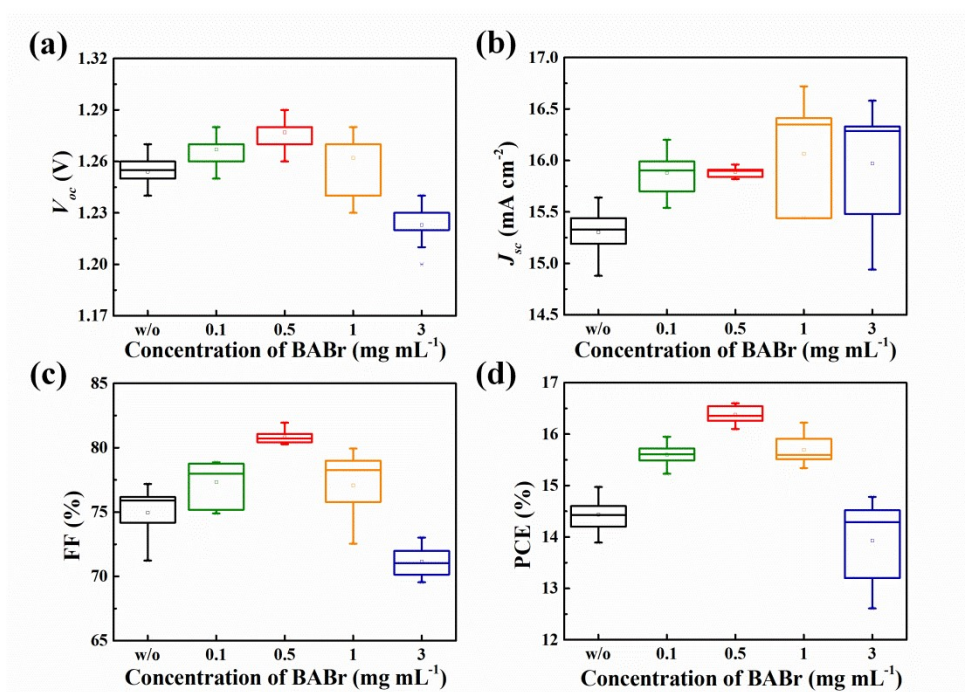

Fig. S8 (a)  $V_{oc}$ , (b)  $J_{sc}$ , (c) FF and (d) PCE distributions of pristine device and optimized devices with different concentrations of BABr.



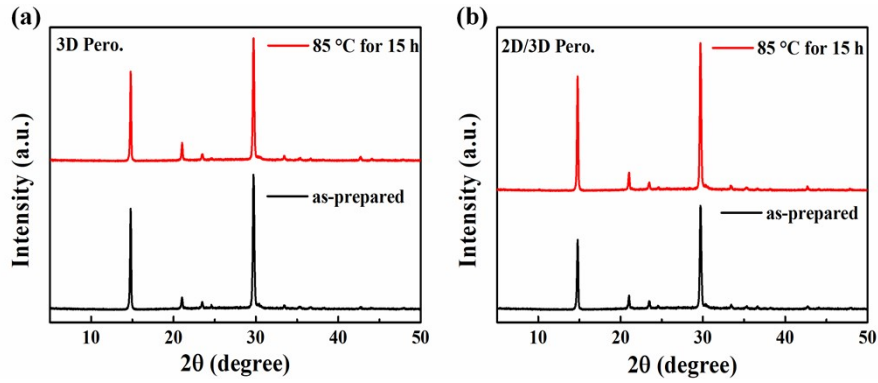

Fig. S9 XRD patterns of (a) 3D CsPbI<sub>2</sub>Br film and (b) 2D/3D CsPbI<sub>2</sub>Br film with and without heating at 85 °C for 15 hours in a N<sub>2</sub> atmosphere.

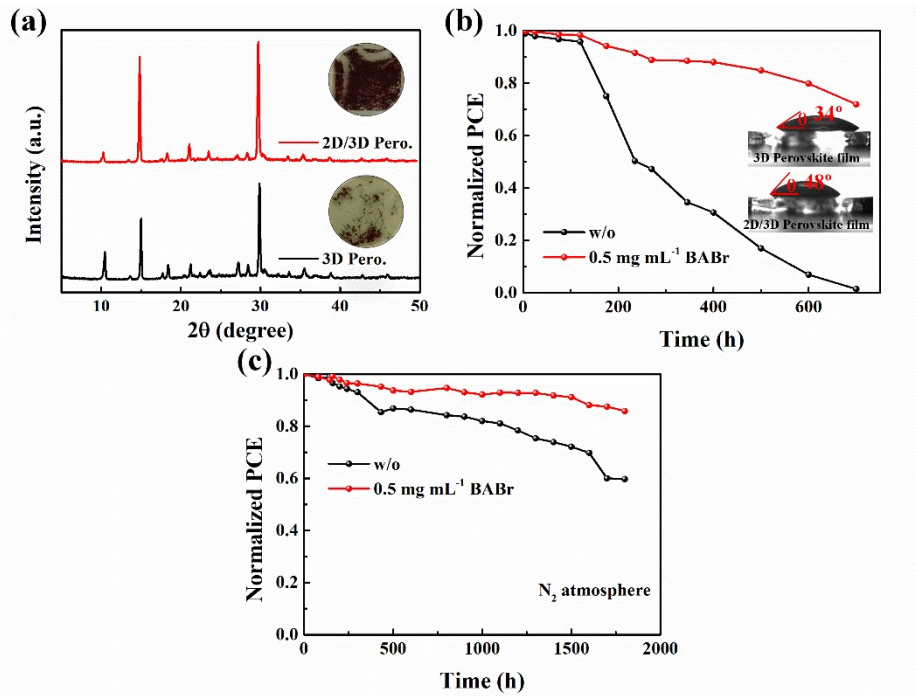

Fig. S10 (a) XRD patterns of 3D CsPbI<sub>2</sub>Br and 2D/3D CsPbI<sub>2</sub>Br films after being placed in the environment (60% RH) for 10 min (the inset is the optical photos of the perovskite films). (b) Moisture stability of the devices aged at the controlled 25% RH ambient condition (the inset is the contact angle of the perovskite films by utilizing water as the test solvent) and (c) the long-term stability of pristine and optimal devices stored in a N<sub>2</sub> atmosphere.

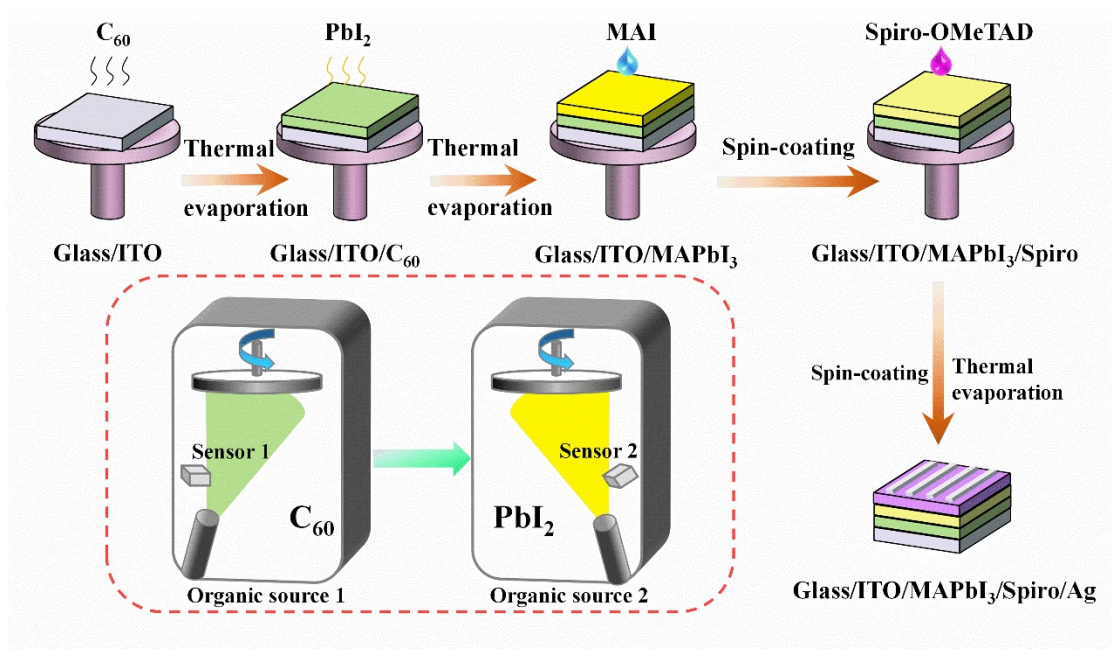

Fig. S11 Fabrication process of MAPbI<sub>3</sub> PSCs.

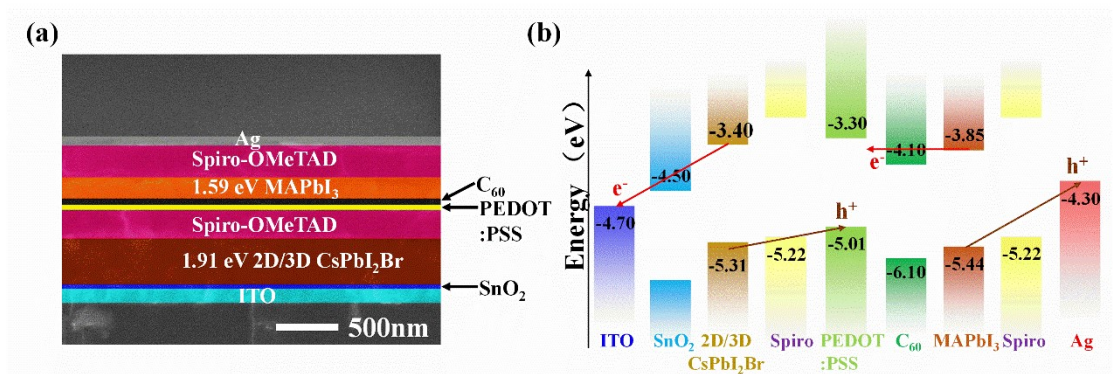

Fig. S12 (a) Cross-sectional SEM and (b) energy band diagram of the monolithic all-PTSC.

Table S1 Fitting parameters of the TRPL decay spectra for CsPbI<sub>2</sub>Br films with different concentrations of BABr.

| <b>BABr (mg mL<sup>-1</sup>)</b> | <b><math>\tau_1</math> (ns)</b> | <b><math>\tau_2</math> (ns)</b> | <b>Average (<math>\tau</math>) (ns)</b> |
|----------------------------------|---------------------------------|---------------------------------|-----------------------------------------|
| <b>w/o</b>                       | 5.92                            | 15.22                           | 12.99                                   |
| <b>0.1</b>                       | 6.65                            | 17.71                           | 13.67                                   |
| <b>0.5</b>                       | 4.97                            | 13.50                           | 11.36                                   |
| <b>1</b>                         | 2.09                            | 10.24                           | 6.30                                    |
| <b>3</b>                         | 0.49                            | 2.47                            | 0.71                                    |

Table S2 Comparison of photovoltaic performance parameters of CsPbI<sub>2</sub>Br PSCs without modification.

| Device Structure                                                                         | Perovskite dimension | $V_{OC}$ (V) | $J_{SC}$ (mA cm <sup>-2</sup> ) | FF (%) | PCE (%) | Ref.      |
|------------------------------------------------------------------------------------------|----------------------|--------------|---------------------------------|--------|---------|-----------|
| ITO/SnO <sub>x</sub> /CsPbI <sub>2</sub> Br/poly (DTSTPD-r-BThTPD)/Au                    | 3D                   | 1.24         | 13.48                           | 75.00  | 12.54   | 1         |
| ITO/SnO <sub>2</sub> /TiO <sub>2</sub> /CsPbI <sub>2</sub> Br/Spiro/MoO <sub>3</sub> /Ag | 3D                   | 1.19         | 15.47                           | 75.26  | 13.85   | 2         |
| FTO/ZnO@SnO <sub>2</sub> /CsPbI <sub>2</sub> Br/Spiro/MoO <sub>3</sub> /Ag               | 3D                   | 1.03         | 16.34                           | 69.00  | 11.66   | 3         |
| ITO/SnO <sub>2</sub> /PN4N/CsPbI <sub>2</sub> Br/PDCBT/MoO <sub>3</sub> /Ag              | 3D                   | 1.08         | 14.8                            | 76.70  | 12.30   | 4         |
| ITO/SnO <sub>2</sub> /CsPbI <sub>2</sub> Br/CsBr/Spiro/Au                                | 3D                   | 1.10         | 16.17                           | 66.68  | 11.81   | 5         |
| ITO/Im-SnO <sub>2</sub> /CsPbI <sub>2</sub> Br/Spiro/Au                                  | 3D                   | 1.20         | 15.44                           | 76.15  | 14.11   | 6         |
| ITO/ZnO/SnO <sub>2</sub> /CsPbI <sub>2</sub> Br/ (PEABr <sup>+</sup> CsBr)/Spiro/Ag      | 3D                   | 1.23         | 15.4                            | 74.00  | 14.00   | 7         |
| ITO/ZnO-SnO <sub>2</sub> /SC-CsPbI <sub>2</sub> Br/Spiro/Ag                              | 3D                   | 1.25         | 15.10                           | 75.11  | 14.45   | 8         |
| ITO/SnO <sub>2</sub> /CsPbI <sub>2</sub> Br/Spiro/Ag                                     | 2D/3D                | 1.06         | 15.96                           | 81.50  | 13.70   | 9         |
| ITO/SnO <sub>2</sub> /CsPbI <sub>2</sub> Br/Spiro/Ag                                     | 2D/3D                | 1.25         | 15.61                           | 75.71  | 14.78   | This work |

Table S3 Comparison of photovoltaic performance parameters of "champion" CsPbI<sub>2</sub>Br PSCs.

| Device Structure                                                                         | Perovskite dimension | V <sub>oc</sub> (V) | J <sub>sc</sub> (mA cm <sup>-2</sup> ) | FF (%) | PCE (%) | Ref.      |
|------------------------------------------------------------------------------------------|----------------------|---------------------|----------------------------------------|--------|---------|-----------|
| ITO/SnO <sub>x</sub> /CsPbI <sub>2</sub> Br/poly (DTSTPD-r-BThTPD)/Au                    | 3D                   | 1.41                | 14.25                                  | 77.00  | 15.53   | 1         |
| ITO/SnO <sub>2</sub> /TiO <sub>2</sub> /CsPbI <sub>2</sub> Br/Spiro/MoO <sub>3</sub> /Ag | 3D                   | 1.23                | 15.67                                  | 82.29  | 15.86   | 2         |
| FTO/ZnO@SnO <sub>2</sub> /CsPbI <sub>2</sub> Br/Spiro/MoO <sub>3</sub> /Ag               | 3D                   | 1.11                | 16.45                                  | 79.00  | 14.35   | 3         |
| ITO/SnO <sub>2</sub> /PN4N/CsPbI <sub>2</sub> Br/PDCBT/MoO <sub>3</sub> /Ag              | 3D                   | 1.30                | 15.30                                  | 81.50  | 16.20   | 4         |
| ITO/SnO <sub>2</sub> /CsPbI <sub>2</sub> Br/CsBr/Spiro/Au                                | 3D                   | 1.27                | 16.72                                  | 77.18  | 16.37   | 5         |
| ITO/Im-SnO <sub>2</sub> /CsPbI <sub>2</sub> Br/Spiro/Au                                  | 3D                   | 1.31                | 15.53                                  | 79.13  | 16.10   | 6         |
| ITO/ZnO/SnO <sub>2</sub> /CsPbI <sub>2</sub> Br/ (PEABr+ CsBr)/Spiro/Ag                  | 3D                   | 1.30                | 15.64                                  | 82.00  | 16.70   | 7         |
| ITO/ZnO-SnO <sub>2</sub> /SC-CsPbI <sub>2</sub> Br/Spiro/Ag                              | 3D                   | 1.31                | 15.90                                  | 81.48  | 16.97   | 8         |
| ITO/SnO <sub>2</sub> /CsPbI <sub>2</sub> Br/Spiro/Ag (BAI)                               | 2D/3D                | 1.08                | 16.80                                  | 80.10  | 14.50   | 9         |
| ITO/SnO <sub>2</sub> /CsPbI <sub>2</sub> Br/Spiro/Ag (BABr)                              | 2D/3D                | 1.28                | 15.92                                  | 81.35  | 16.57   | This work |

Table S4 Comparison of configuration and photovoltaic performance parameters of monolithic all-perovskite tandem solar cells.

| Sub cells     | Absorbers                                                             | Recombination layer | $V_{oc}$ (V) | $J_{sc}$ (mA cm <sup>-2</sup> ) | FF    | PCE (%) | Ref.      |
|---------------|-----------------------------------------------------------------------|---------------------|--------------|---------------------------------|-------|---------|-----------|
| Top<br>Bottom | MAPbI <sub>3</sub> (1.55 eV)<br>MAPbI <sub>3</sub> (1.55 eV)          | PEDOT:PSS           | 1.89         | 6.61                            | 56.00 | 7.00    | 10        |
| Top<br>Bottom | MAPbBr <sub>3</sub> (2.30 eV)<br>MAPbI <sub>3</sub> (1.55 eV)         | PEDOT:PSS           | 1.96         | 6.40                            | 41.00 | 5.10    | 11        |
| Top<br>Bottom | 2D/3D CsPbI <sub>2</sub> Br (1.91 eV)<br>MAPbI <sub>3</sub> (1.55 eV) | PEDOT:PSS           | 2.33         | 8.04                            | 54.54 | 10.22   | This work |

## References

1. Z. Guo, A. K. Jena, I. Takeji, G. M. Kim, M. A. Kamarudin, Y. Sanehira, A. Ishii, Y. Numata, S. Hayase and T. Miyasaka, *J. Am. Chem. Soc.*, 2020, **142**, 9725-9734.
2. Y. Wang, C. Duan, X. Zhang, N. Rujisamphan, Y. Liu, Y. Li, J. Yuan and W. Ma, *ACS Appl. Mater. Interfaces*, 2020, **12**, 31659-31666.
3. Z. Li, R. Wang, J. Xue, X. Xing, C. Yu, T. Huang, J. Chu, K.-L. Wang, C. Dong, Z. Wei, Y. Zhao, Z.-K. Wang and Y. Yang, *J. Am. Chem. Soc.*, 2019, **141**, 17610-17616.
4. J. Tian, Q. Xue, X. Tang, Y. Chen, N. Li, Z. Hu, T. Shi, X. Wang, F. Huang, C. J. Brabec, H.-L. Yip and Y. Cao, *Adv. Mater.*, 2019, **31**, 1901152.
5. Y. Zhang, C. Wu, D. Wang, Z. Zhang, X. Qi, N. Zhu, G. Liu, X. Li, H. Hu, Z. Chen, L. Xiao and B. Qu, *Sol. RRL*, 2019, **3**, 1900254.
6. S. Liu, W. Chen, Y. Shen, S. Wang, M. Zhang, Y. Li and Y. Li, *J. Mater. Chem. A*, 2020, **8**, 14555-14565.
7. J. He, J. Su, Z. Lin, J. Ma, L. Zhou, S. Zhang, S. Liu, J. Chang and Y. Hao, *Adv. Sci.*, 2021, **8**, 2101367.
8. J. Ma, Z. Lin, X. Guo, L. Zhou, J. He, Z. Yang, J. Zhang, Y. Hao, S. Liu and J. Chang, *J. Energy Chem.*, 2021, **63**, 558-565.
9. M. Tai, Y. Zhou, X. Yin, J. Han, Q. Zhang, Y. Zhou and H. Lin, *J. Mater. Chem. A*, 2019, **7**, 22675-22682.
10. F. Jiang, T. Liu, B. Luo, J. Tong, F. Qin, S. Xiong, Z. Li and Y. Zhou, *J.*

*Mater. Chem. A*, 2016, **4**, 1208-1213.

11. R. Sheng, M. T. Hörantner, Z. Wang, Y. Jiang, W. Zhang, A. Agosti, S. Huang, X. Hao, A. Ho-Baillie, M. Green and H. J. Snaith, *J. Phys. Chem. C*, 2017, **121**, 27256-27262.
